# Supplementary material
Source: PubMed Central journal article supplement (PMC2610152)

# Supplemental Figure 1

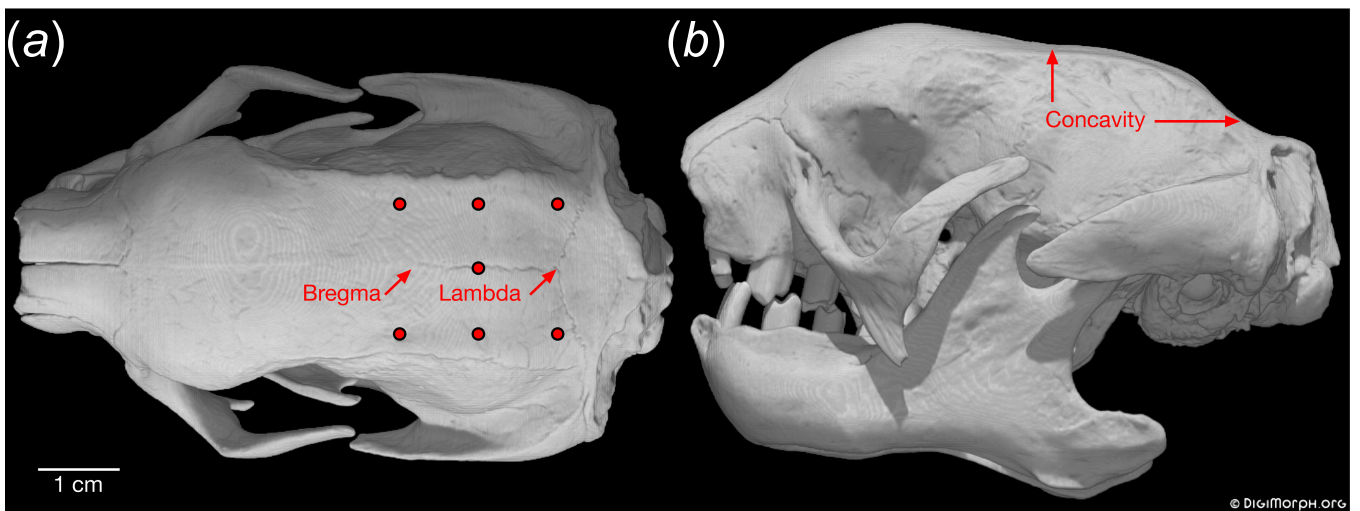

Supplement: rsbl20080203s51.pdf [file rsbl20080203s51.pdf]

Supplemental Figure 2

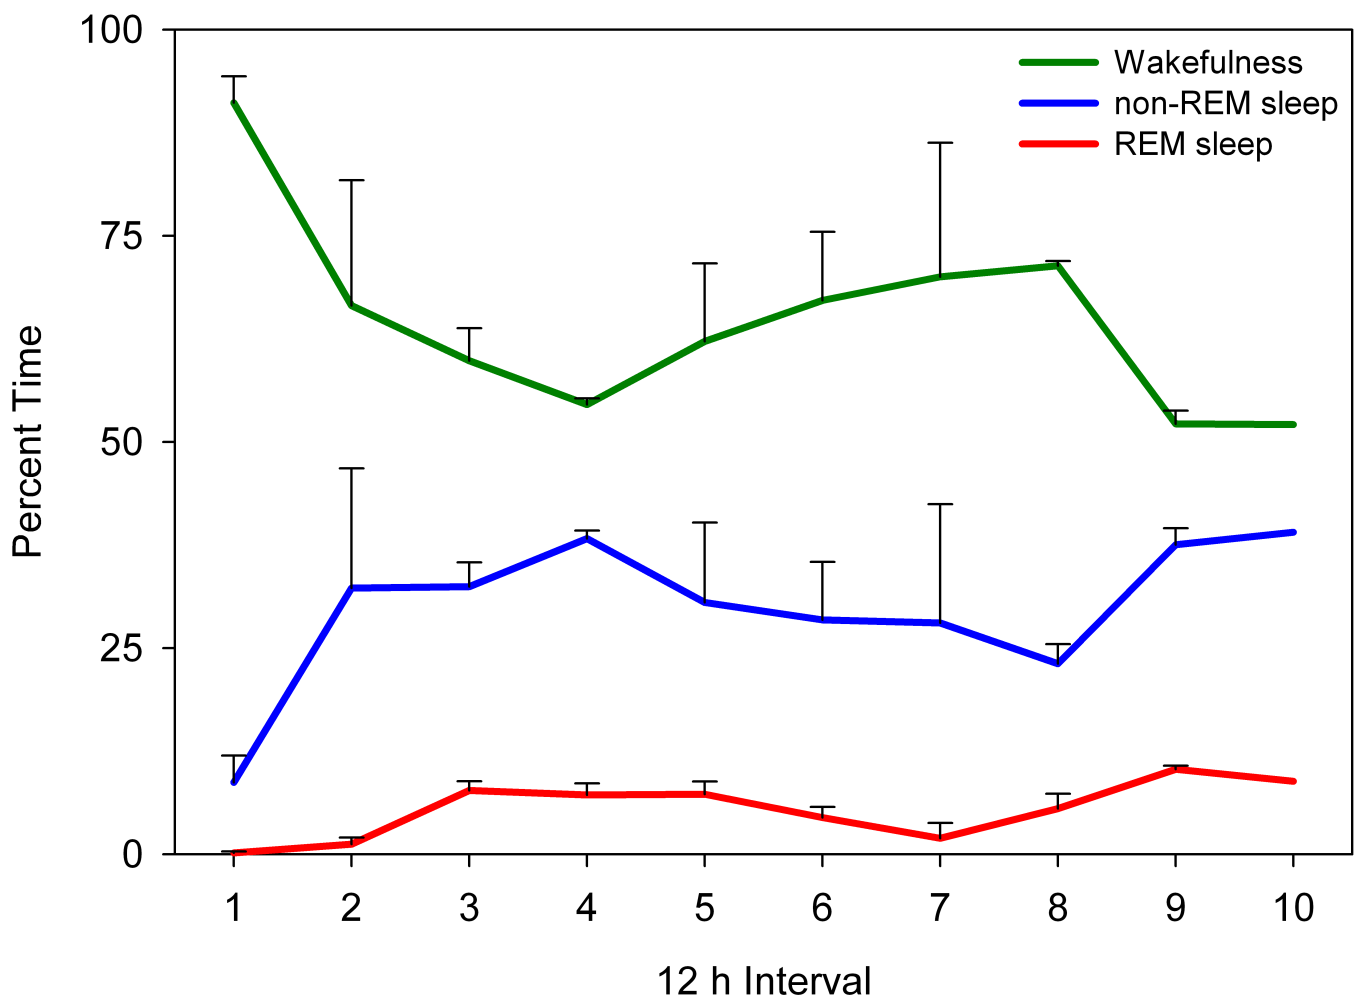

Supplement: rsbl20080203s52.pdf [file rsbl20080203s52.pdf]

### Supplemental Figure 3

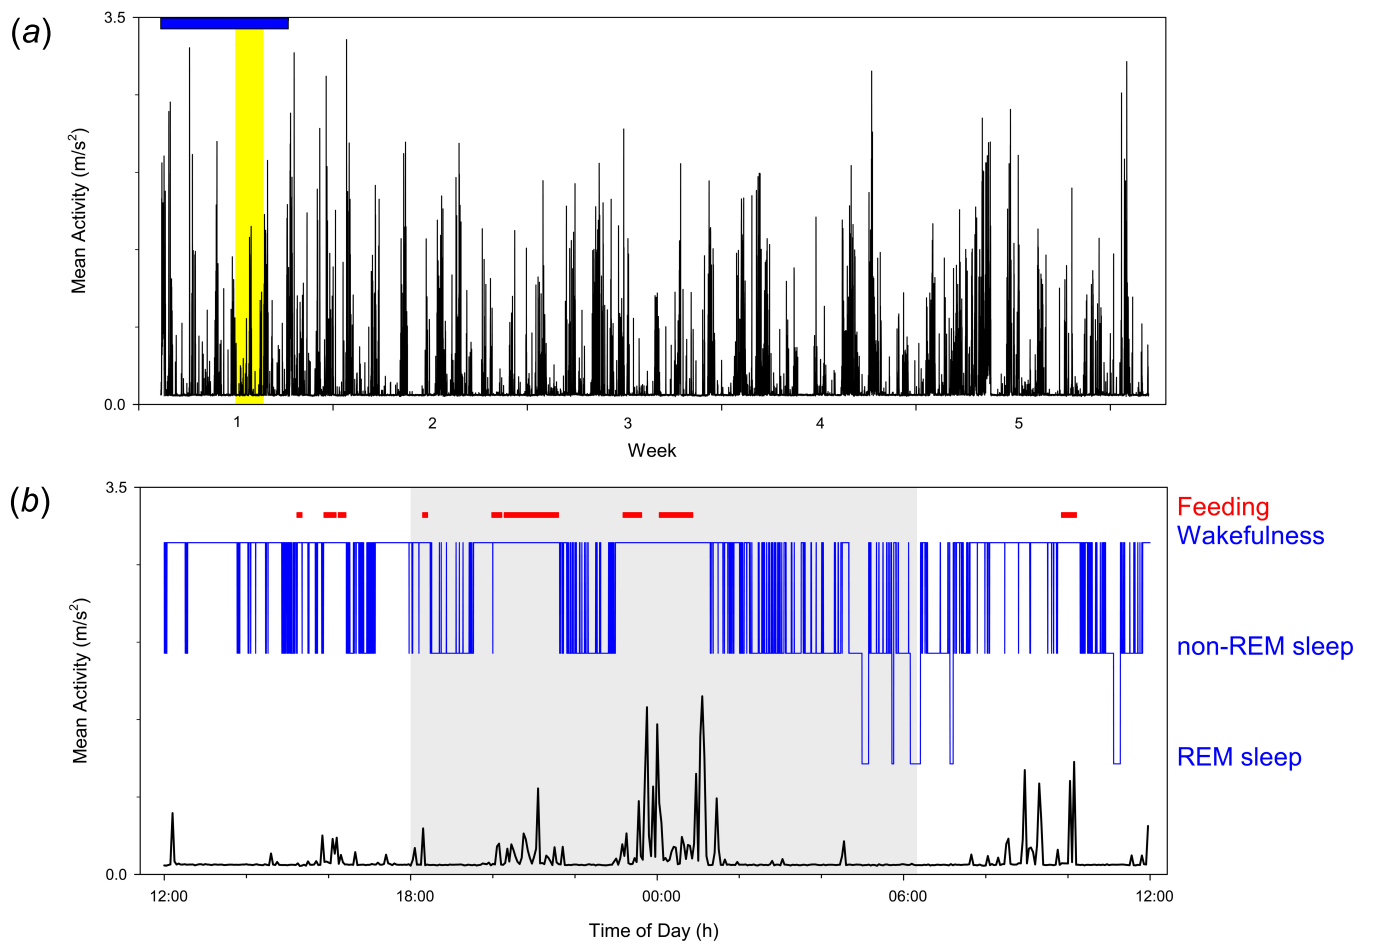

Supplement: rsbl20080203s53.pdf [file rsbl20080203s53.pdf]

### Supplemental Figure 4

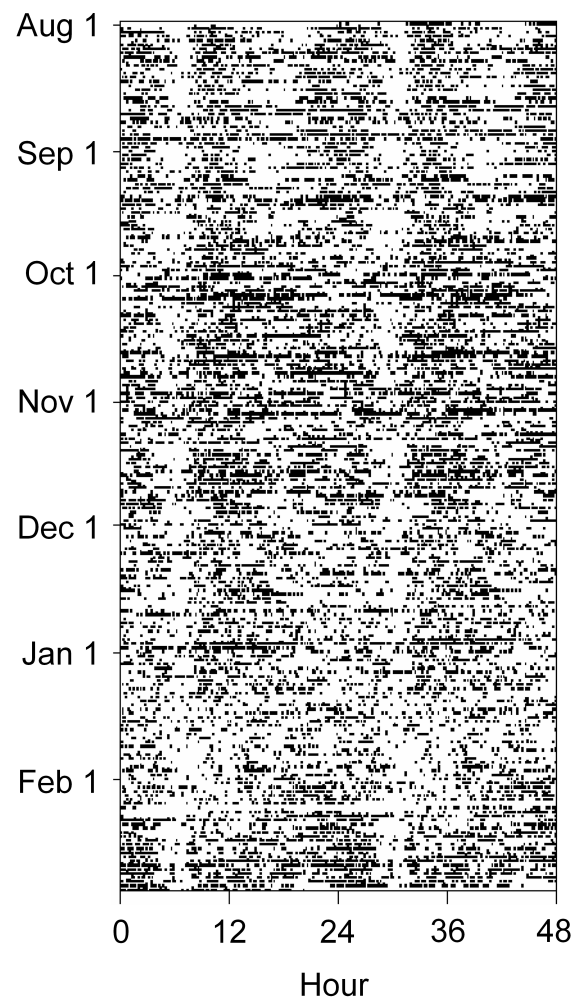

Supplement: rsbl20080203s54.pdf [file rsbl20080203s54.pdf]
